# Supplementary material for: Shear rate sensitizes bacterial pathogens to H2O2 stress
Source: PubMed Central journal article supplement — Proc Natl Acad Sci U S A. 2023 Mar 8;120(11):e2216774120. doi: 10.1073/pnas.2216774120 (PMC10089187; doi:10.1073/pnas.2216774120), 2023-03-08
Supplement: pnas.2216774120.sapp.pdf [file pnas.2216774120.sapp.pdf]

# SI Appendix for

1

## 2 **Shear rate sensitizes bacterial pathogens to H<sub>2</sub>O<sub>2</sub> stress**

3

4 Gilberto C. Padron<sup>1</sup>, Alexander M. Shuppara<sup>1</sup>, Anuradha Sharma<sup>1</sup>, Matthias D. Koch<sup>2</sup>, Jessica-  
5 Jae S. Palalay<sup>1</sup>, Jana N. Radin<sup>3</sup>, Thomas E. Kehl-Fie<sup>3,4</sup>, James A. Imlay<sup>3</sup>, Joseph E. Sanfilippo<sup>1\*</sup>

6

7 <sup>1</sup>Department of Biochemistry, University of Illinois at Urbana-Champaign

8 <sup>2</sup>Department of Biology, Texas A&M University

9 <sup>3</sup>Department of Microbiology, University of Illinois at Urbana-Champaign

10 <sup>4</sup>Carl R. Woese Institute for Genomic Biology, University of Illinois at Urbana-Champaign

11 \*To whom correspondence should be addressed. Email: josephes@illinois.edu

## 12 **This includes:**

13 Materials and Methods

14 Supplemental Figures S1 to S12

15 Supplemental Tables S1 to S3

16 References

## 17 **Materials and Methods**

### 18 19 Strains, plasmids, and growth conditions

20 The bacterial strains used in this paper are described in the Supplementary Table 1. Primers  
21 are listed in Supplementary Table 2, and plasmids used are described in Supplementary Table  
22 3. *P. aeruginosa* cultures were grown in liquid LB on a roller drum, and on LB plates (1.5%  
23 Bacto Agar) at 37 °C. *S. aureus* cultures were grown in liquid LB supplemented with  
24 chloramphenicol (10 µg ml<sup>-1</sup>), and on LB plates with chloramphenicol at 37 °C. LB was prepared  
25 using premix Miller LB Broth (BD Biosciences) using standard LB preparation protocols.  
26 M9 minimal media with casamino acids was prepared using M9CA broth premix (VWR) and  
27 supplemented with 1 M magnesium sulfate (Sigma), 1 M calcium chloride (Sigma) and 20%  
28 glucose (VWR). Sodium hydroxide (NaOH) was used to pH solution to 7.4.

### 29 30 Generation of *P. aeruginosa* mutants

31 Gene deletions were generated using the lambda Red recombinase system as previously  
32 described<sup>13,46</sup>. The deletion construct was Gibson-assembled from three PCR products. First,  
33 approximately 500 bp upstream of the target insertion site was amplified from PA14 genomic  
34 DNA. Second, a fragment containing *aacC1* ORF flanked by FRT sites was amplified from  
35 pAS03. Third, approximately 500 bp downstream of the target insertion site was amplified from  
36 PA14 genomic DNA. The Gibson- assembled product was transformed into PA14 cells  
37 expressing the plasmid pUCP18-RedS. The colonies were selected on 30 µg ml<sup>-1</sup> gentamycin,  
38 and then the mutants of interest were counter-selected on 5% sucrose, and pFLP2 was used to  
39 flip out the antibiotic resistance gene. pUCP18-RedS and pFLP2 were selected for using 300 µg  
40 ml<sup>-1</sup> carbenicillin. The double and triple mutants were created by subsequent deletions  
41 performed similarly.

### 42 43 Generation of *S. aureus* strains

44 USA300  $\Delta$ *ahpCF* was generated by amplifying the 5' and 3' flanking regions (~1 kb up- and  
45 downstream) of *ahpCF* using the indicated primers (Table S2). 5' and 3' fragments were cloned  
46 into the pKOR1 knockout vector via site-specific recombination. The deletions were created  
47 using allelic replacement, as described previously<sup>47</sup>. USA300 JE2 *katA*:erm was obtained from  
48 the Nebraska library<sup>48</sup>. USA300 JE2 *katA*:erm  $\Delta$ *ahpCF* was generated by transducing the  
49 *katA*:erm allele via  $\Phi$ 85 phage from USA300 JE2 *katA*:erm. To create the *ahpCF* reporter  
50 construct, the *ahpCF* promoter was cloned into the pAH5 vector<sup>49</sup> via the indicated primers  
51 (Table S2). All constructs were verified by sequencing and all mutant strains were confirmed to  
52 be hemolytic by growth on TSA blood agar plates.

### 53 54 Bacterial Conditioning of LB Media and H<sub>2</sub>O<sub>2</sub> treatment

55 *P. aeruginosa* and *S. aureus* were used to condition media for experiments involving their  
56 respective bacteria. Media were conditioned by diluting 50 µL of bacteria from an overnight  
57 culture into a 5 mL tube (or scaled up at the same ratio) and allowing it to sit for a defined period  
58 at 22 °C. Bacterial cells were then filtered out using a Steriflip sterile filter unit (0.22 µm pore  
59 size). To generate LB with defined H<sub>2</sub>O<sub>2</sub> concentrations, LB was first conditioned, and then  
60 defined concentrations of H<sub>2</sub>O<sub>2</sub> were added. For experiments using purified catalase, 8 mg/ml of  
61 bovine liver catalase (Sigma) was used.

### 62 63 Fabrication of microfluidic devices

64 Microfluidic devices were created and fabricated using soft lithography techniques. Devices  
65 were designed on Illustrator (Adobe Creative Suite) and masks were subsequently printed by  
66 CAD/Art Services. Molds were produced on 100mm silicon wafers (University Wafer) and then  
67 spin coated with SU-8 3050 photoresist (MicroChem). Polydimethylsiloxane (PDMS) chips were

68 plasma-treated for bonding to glass slides at least 24 hours before experiments. The devices  
69 used in all other experiments discussed above using the *fro* reporter and  $P_{ahp}$  reporter contained  
70 7 parallel channels 500  $\mu\text{m}$  wide x 50  $\mu\text{m}$  tall x 2 cm long. Long channel experiments used  
71 device that were 500  $\mu\text{m}$  wide x 50  $\mu\text{m}$  tall x 27 cm long. Each channel individually contained an  
72 inlet and an outlet. These chips were plasma bonded to a 60 mm x 35 mm x 0.16 mm superslip  
73 micro cover glass (Ted Pella, Inc.).  
74

#### 75 *P. aeruginosa* in microfluidic devices

76 Experiments involving the *fro* reporter were conducted using microfluidic channels seeded with  
77 cells from a mid-log culture with an optical density of approximately 0.5, unless otherwise  
78 specified. For Figure S11, cells were seeded into the channel from either a low cell density (OD  
79  $\sim 0.2$ ) or a medium cell density (OD  $\sim 0.5$ ) culture. All microfluidic experiments in the paper  
80 were performed at  $\sim 22$   $^{\circ}\text{C}$ . Cells were injected into the microfluidic device using a pipette and  
81 were allowed to settle in the device for 10 minutes prior to exposure to flow. The device set-up  
82 involves the use of plastic 5 mL syringes (BD) with attached tubing connecting the needle to the  
83 inlet of the device (BD Intramedic Polyethylene Tubing; 0.38 mm inside diameter, 1.09 mm  
84 outside diameter). These syringes were situated on a syringe pump (KD Scientific Legato 210)  
85 which was used to produce fluid flow. The outlet of the device employed the same tubing and  
86 vacated into a bleach-containing waste container. The syringe pump was used to generate flow  
87 rates of 0.1-10  $\mu\text{L}/\text{min}$ , which correspond to shear rates of 8 – 800  $\text{s}^{-1}$ .  
88

#### 89 *S. aureus* in microfluidic devices

90 Experiments measuring  $P_{ahp}$  expression in *S. aureus* reporter use cells from mid-log phase  
91 culture. Flow media was conditioned in *S. aureus* cells for at most 1 hour. Conditioned LB was  
92 filtered of cells and supplemented with 8  $\mu\text{M}$   $\text{H}_2\text{O}_2$  before loading into 5 mL syringe. Cells were  
93 injected directly into the flow chamber inlet with a pipette and allowed to settle for 10 min. Flow  
94 devices were setup with exact same methods as described in *P. aeruginosa* in microfluidic  
95 devices. For no flow conditions, injected cells in flow chambers were given fresh conditioned LB  
96 with 8  $\mu\text{M}$   $\text{H}_2\text{O}_2$  for 2 min.  
97

#### 98 Shear rate calculations

99 The shear rate experienced in the microfluidic devices was calculated using the equation:

$$100 \quad \frac{6Q}{wh^2}$$

101 Where Q is flow rate, w is channel width, and h is the channel height.  
102

#### 103 Phase contrast and fluorescence microscopy

104 Images were obtained on a Nikon Eclipse Ti-2 microscope using the NIS Elements interface. All  
105 images were taken with Nikon 40x Plan Apo Ph2 0.95 NA objective, a Hamamatsu Orca-  
106 Flash4.0LT camera, and Lumencor Sola Light Engine LED light source.  
107

#### 108 Quantification of *fro/ahpCF* expression

109 To quantify reporter intensity during flow treatment, we optimized and employed a MATLAB-  
110 based program<sup>50</sup> to identify cells and quantify single cell fluorescence intensity (Figure S1). The  
111 image analysis pipeline employs a readily available quantification program (OUFTI) as well as  
112 novel code written in MATLAB (Mathworks). Using OUFTI, cell meshes were developed and  
113 then used to quantify fluorescence on the YFP and a constitutive mCherry. Expression of  
114 mCherry is driven by a  $P_{A1/04/03}$  promoter that has been shown previously to be constitutive<sup>13,51</sup>.  
115 In the case of the *S. aureus* experiments, only YFP was used. These computed values were  
116 then extracted and averaged in MATLAB to yield the per-frame average fluorescence intensity  
117 of all cells meshed ( $>100$  per frame) across 3 technical replicates. The ratio of YFP/mCherry or

118 YFP/YFP were then taken to obtain a representative induction value of *P. aeruginosa* fro  
119 expression and *S. aureus* P<sub>ahp</sub> expression.

120

### 121 Mathematical simulations

122 To simulate the advection-diffusion of H<sub>2</sub>O<sub>2</sub> molecules in the microfluidic channel, we combined  
123 the laminar transport due to flow with a Brownian dynamics simulation to capture the diffusive  
124 behavior. Initially, the simulated channel was seeded with molecules at random positions  
125 according to the concentration *c*. Flow was then modeled with a parabolic flow speed profile

126  $v(y) = v_0 \left( 1 - \left( \frac{y - \frac{h}{2}}{\frac{h}{2}} \right)^2 \right)$  according to the Hagen-Poiseuille equation, with the channel height *h*

127 and width *w* and maximum velocity  $v_0 = 1.7 \cdot 10^{-11} \frac{3}{2hw} Q$  in the center of the channel. In time  
128 steps of  $\Delta t = 1$  ms, each particle was then displaced along the channel according to its lateral

129 position *v*(*y*). In addition, each particle was allowed to diffuse the distance  $\frac{\Delta x/y}{\Delta t} = n_0 \sqrt{\frac{24D_h}{\Delta t}}$  lateral

130 (*y*) and along (*x*) the channel, where *n*<sub>0</sub> is a random number drawn from a uniform distribution in  
131 the interval  $-0.5 \leq n_0 \leq 0.5$  and  $D_h = 1.5 \cdot 10^{-9} \frac{m^2}{s}$  is the diffusion coefficient of H<sub>2</sub>O<sub>2</sub>.

132

133 For the simulations, we estimated that 1 of every 100 molecules that reached the channel  
134 bottom (where cells are located) were removed. Based on the simulated results, we confirmed  
135 that our estimate was reasonable based on the following logic: Figure 3 shows that cells at OD  
136 of ~0.5 remove a majority of H<sub>2</sub>O<sub>2</sub> in 30 seconds, our calculations show that cells in microfluidic  
137 channels are also at an OD of ~0.5, our calculations show that media flowing at 80 sec<sup>-1</sup> resides  
138 in the channel for ~30 seconds, and our simulation demonstrates that a shear rate of 80 sec<sup>-1</sup>  
139 results in scavenging of a majority of H<sub>2</sub>O<sub>2</sub> molecules using our 1 in 100 estimate.

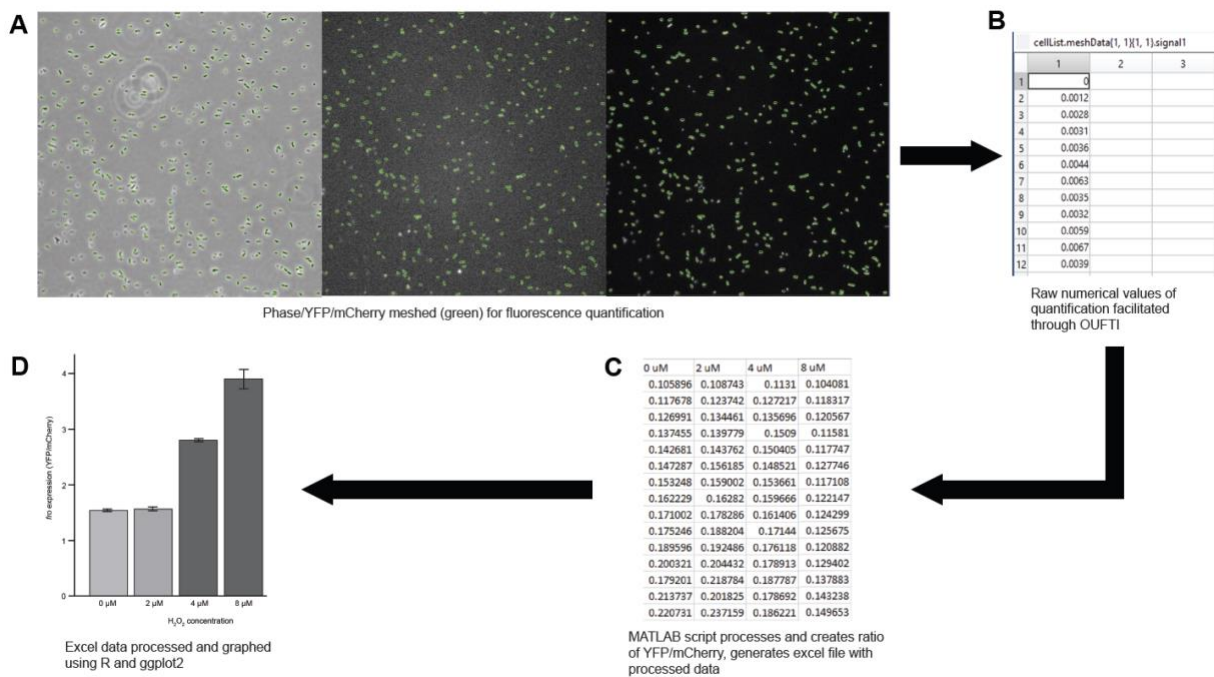

140  
141  
142  
143  
144  
145  
146  
147

**Figure S1: Computational workflow for fluorescence based single cell microscopy quantification.** (A) Raw microscopy images demonstrating meshes generated through OUFTI from phase image. Meshes overlaid over YFP and mCherry fluorescent images. (B) Raw MATLAB output of quantified fluorescent values post-processing with OUFTI. (C) Data post-processing with in-lab MATLAB code to yield final values. (D) Representative plot generated using data yielded from C.

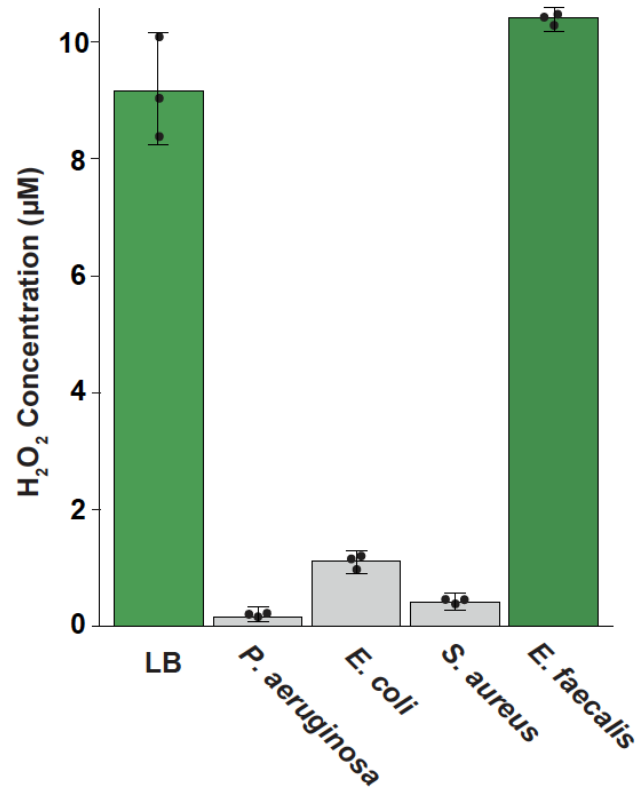

148 **Figure S2: Bacteria scavenging of H<sub>2</sub>O<sub>2</sub> is conserved, but not universal.** H<sub>2</sub>O<sub>2</sub>  
 149 concentration of LB when untreated, or treated with ~0.5 OD wild-type *P. aeruginosa*, *E. coli*, *S.*  
 150 *aureus*, or *E. faecalis* for 30 minutes. H<sub>2</sub>O<sub>2</sub> concentrations were measured using a peroxidase  
 151 assay<sup>21</sup>. Quantification shows the average and standard deviation of three biological replicates.  
 152

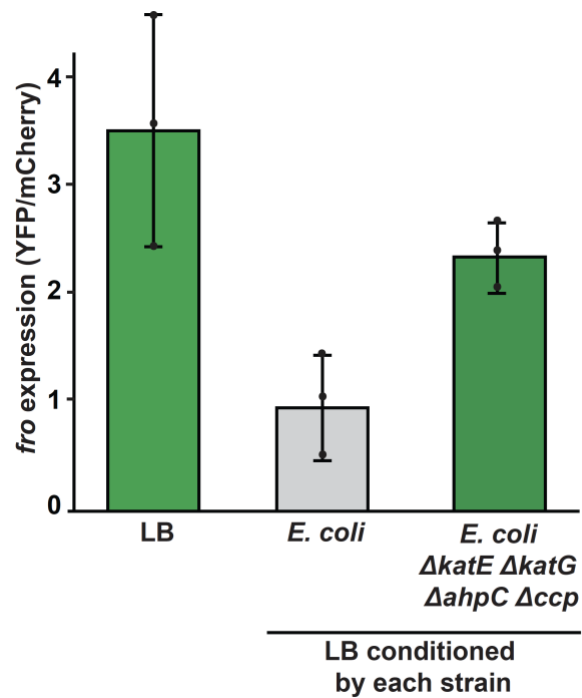

154  
155  
156  
157  
158  
159

**Figure S3. *E. coli* scavenging enzymes are required to condition media.** *P. aeruginosa* *fro* expression after 180 minutes in flow (at a shear rate of  $800 \text{ s}^{-1}$ ) imaged 1 cm into the channel. Cells were exposed to flow of LB media, media conditioned with  $\sim 0.5$  OD wild-type *E. coli*, or media conditioned with  $\sim 0.5$  OD *E. coli*  $\Delta ahpC \Delta katG \Delta katE \Delta ccp$  mutant<sup>20</sup> for 60 minutes. Quantification shows the average and standard deviation of three biological replicates.

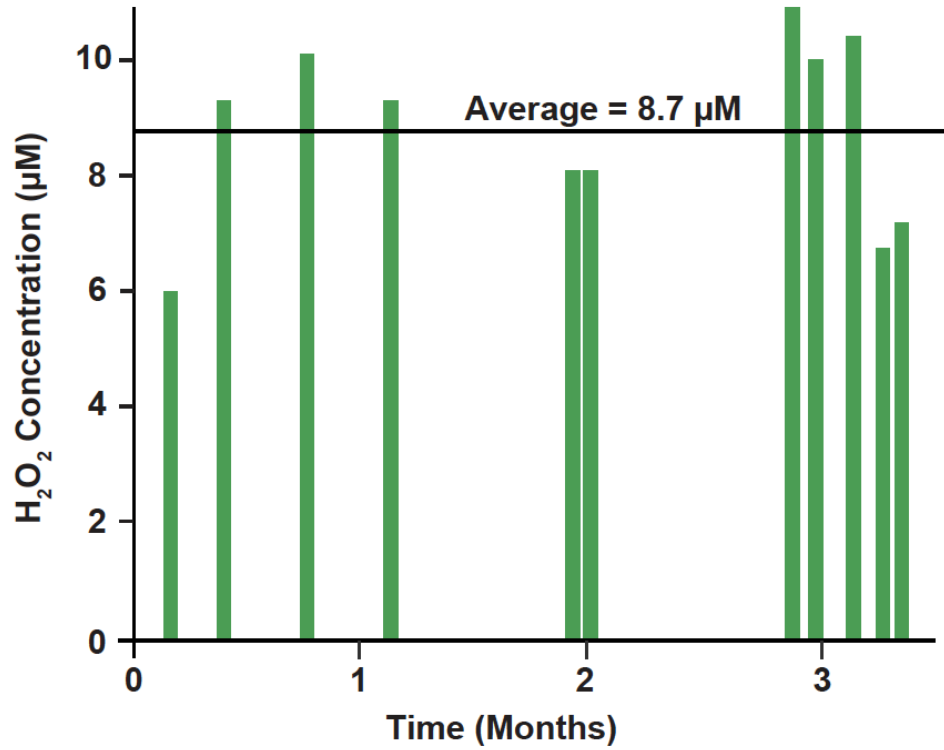

160  
161  
162  
163

**Figure S4: LB contains variable amounts of H<sub>2</sub>O<sub>2</sub> in standard laboratory conditions.** H<sub>2</sub>O<sub>2</sub> concentration of LB from laboratory storage measured over a period of months. H<sub>2</sub>O<sub>2</sub> concentrations were measured using a peroxidase assay<sup>21</sup>.



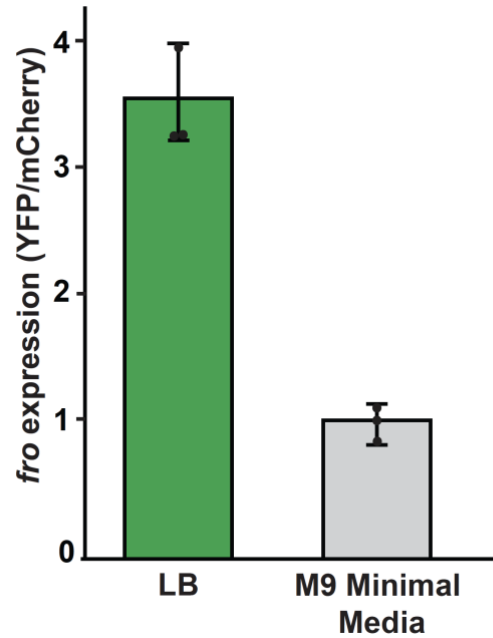

164  
165  
166  
167  
168

**Figure S5: M9 minimal media lacking H<sub>2</sub>O<sub>2</sub> does not induce *fro* expression.** *P. aeruginosa* *fro* expression after 180 minutes in flow (at a shear rate of 800 s<sup>-1</sup>) imaged 1 cm into the channel. Cells were exposed to flow of LB media or M9 minimal media. Quantification shows the average and standard deviation of three biological replicates.

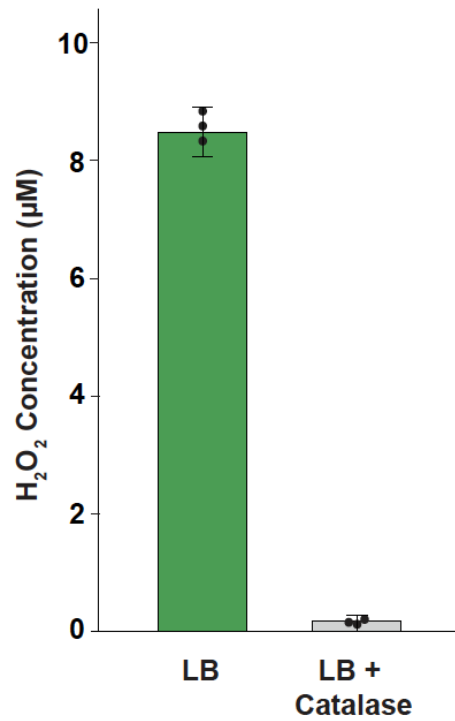

170  
171 **Figure S6: Addition of purified catalase to LB media depletes H<sub>2</sub>O<sub>2</sub>.** H<sub>2</sub>O<sub>2</sub> concentration of  
172 LB when untreated or treated with purified catalase. H<sub>2</sub>O<sub>2</sub> concentrations were measured using  
173 a peroxidase assay<sup>21</sup>. Quantification shows the average and standard deviation of three  
174 biological replicates.

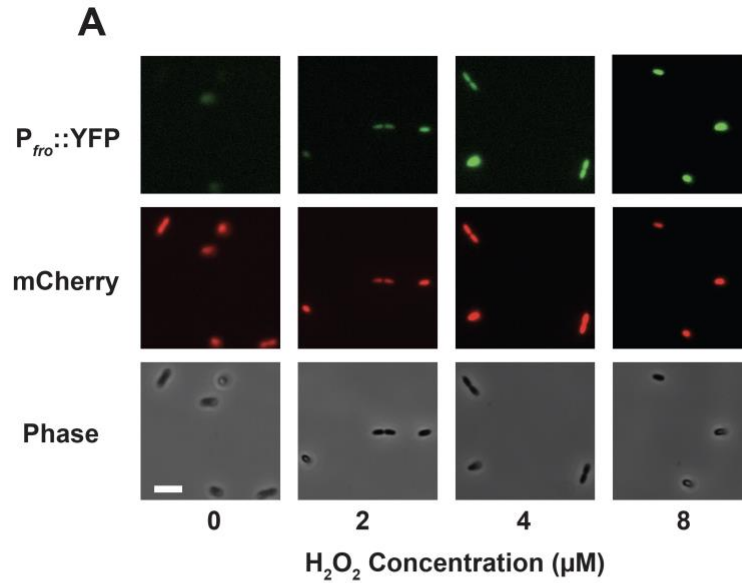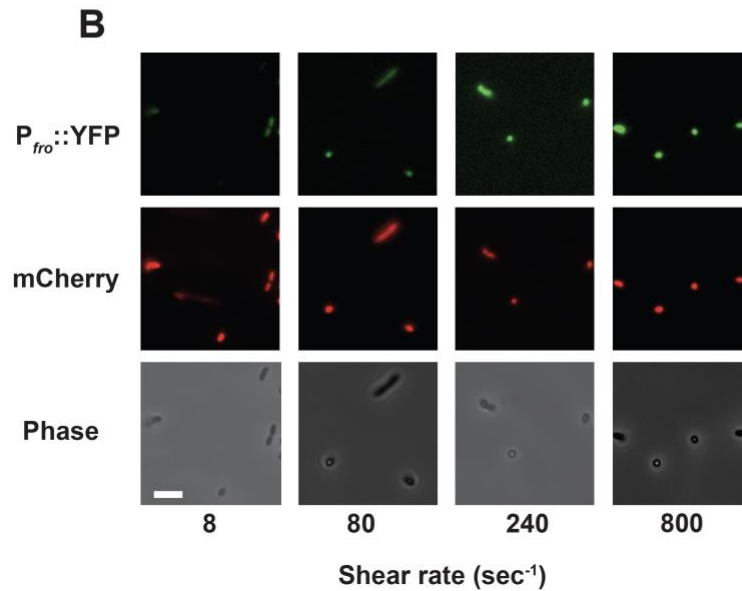

175  
176  
177  
178  
179  
180  
181  
182  
183

**Figure S7:  $H_2O_2$  concentration and shear rate tune flow-sensitive gene expression**

**(A)** YFP fluorescence, mCherry fluorescence, and phase contrast images representative of three biological replicates showing *P. aeruginosa* cells imaged 1 cm into the channel treated with  $800\ sec^{-1}$  flow and LB with varied  $H_2O_2$  concentrations. **(B)** YFP fluorescence, mCherry fluorescence, and phase contrast images representative of three biological replicates showing *P. aeruginosa* cells treated with  $8\ \mu M\ H_2O_2$  and varied shear rates. Scale bars,  $5\ \mu m$ . Channels are  $50\ \mu m$  tall x  $500\ \mu m$  wide.

184  $Pe < 1$  indicates diffusion is dominant transport phenomenon

185

186  $Pe > 1$  indicates shear rate is the dominant transport phenomenon

187

$$188 \quad Pe = \frac{\text{advective transport}}{\text{diffusive transport}}$$

189

$$190 \quad Pe = \frac{\text{shear rate} * \text{cell length}^2}{\text{diffusion coefficient}}$$

191

192 Here we set  $Pe = 1$ , to solve for the critical shear rate.

193

$$194 \quad \text{Critical shear rate} = \frac{\text{diffusion coefficient}}{\text{cell length}^2}$$

195

$$196 \quad \text{Critical shear rate} \approx \frac{1.5 * 10^{-9} \frac{\text{m}^2}{\text{sec}}}{(3.0 * 10^{-6} \text{ m})^2} \approx 166.\bar{6} \text{ sec}^{-1}$$

197

198

199 **Figure S8: Péclet number calculation.** Critical shear rate was calculated by setting the Péclet  
200 number = 1. The diffusion coefficient of  $\text{H}_2\text{O}_2$  was estimated to be  $1.5 \times 10^{-9} \text{ m}^2/\text{sec}^{37}$ . The cell  
201 length of *P. aeruginosa* was estimated to be  $3 \mu\text{m}$ . Cell length is used a characteristic length  
202 that defines the relevant scale of the system.

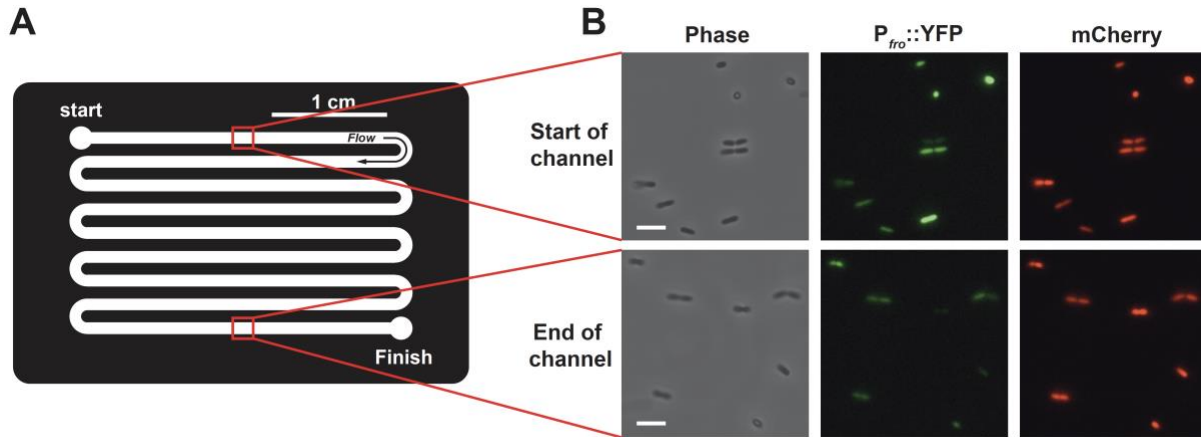

203  
 204  
 205  
 206  
 207  
 208  
 209  
 210  
 211

**Figure S9: Flow generates gradients of H<sub>2</sub>O<sub>2</sub> and gene expression**

**(A)** Schematic showing top-down view of the long channel microfluidic device used in Figure 4E and in panel B. **(B)** Phase contrast, YFP fluorescence, and mCherry fluorescence images representative of three biological replicates showing *P. aeruginosa* cells treated with 240 sec<sup>-1</sup> flow and LB with a H<sub>2</sub>O<sub>2</sub> concentration of 8 μM. Images are from the middle of lane 1 (“start of channel”, 1.5 cm) and the middle of lane 9 (“end of channel”, 25.5 cm). Scale bars, 5 μm. Channels are 50 μm tall x 500 μm wide x 27 cm long.

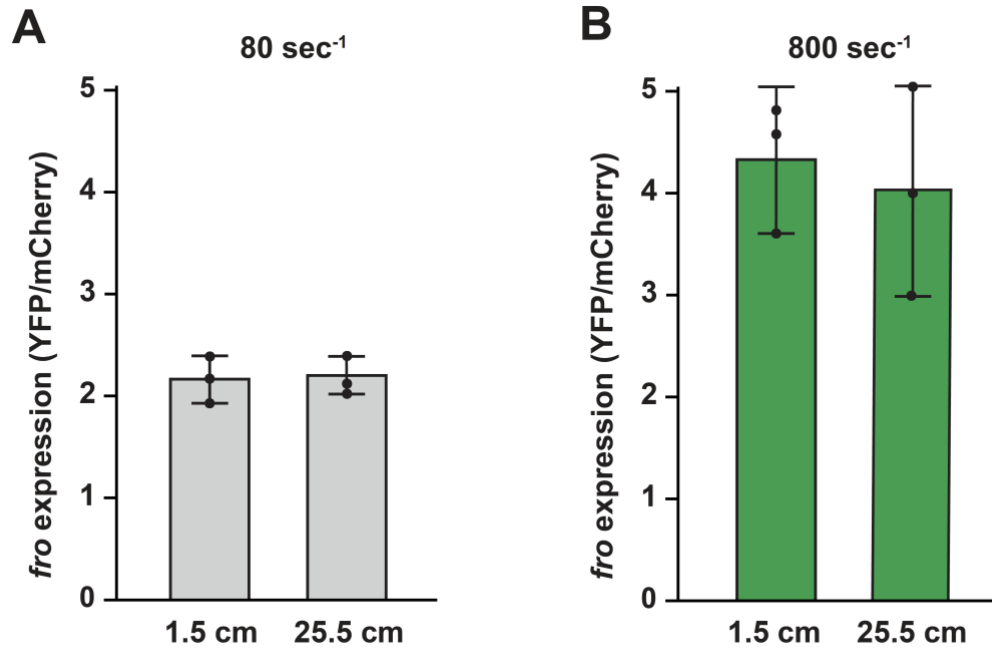

212  
 213 **Figure S10: Long distance transport of H<sub>2</sub>O<sub>2</sub> is dependent on shear rate. (A)** *P. aeruginosa*  
 214 *fro* expression after 180 minutes in flow (at a shear rate of 80 sec<sup>-1</sup>) using LB with a H<sub>2</sub>O<sub>2</sub>  
 215 concentration of 8 μM imaged at 1.5 cm and 25.5 cm in a 27 cm channel. **(B)** *P. aeruginosa* *fro*  
 216 expression after 180 minutes in flow (at a shear rate of 800 sec<sup>-1</sup>) with 8 μM H<sub>2</sub>O<sub>2</sub> LB imaged at  
 217 1.5 cm and 25.5 cm in a 27 cm channel. Quantification shows the average and standard  
 218 deviation of three biological replicates.

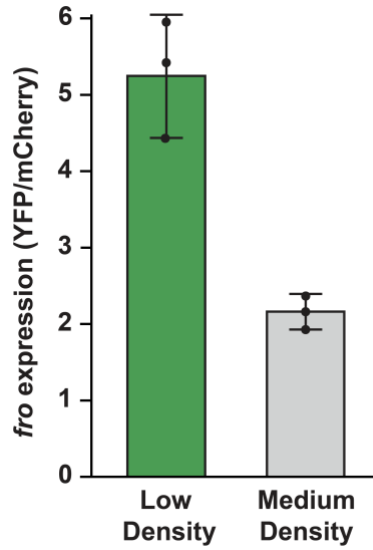

219  
220  
221  
222  
223  
224

**Figure S11: *P. aeruginosa* fro induction is dependent on cell density in flow.** *P. aeruginosa* fro expression after 180 minutes in flow using LB with a H<sub>2</sub>O<sub>2</sub> concentration of 8 μM imaged at 1.5 cm into a channel. Cells were seeded into the channel from a low cell density culture (~0.2 OD) or a medium density culture (~0.5 OD). Quantification shows the average and standard deviation of three biological replicates.

225  
226

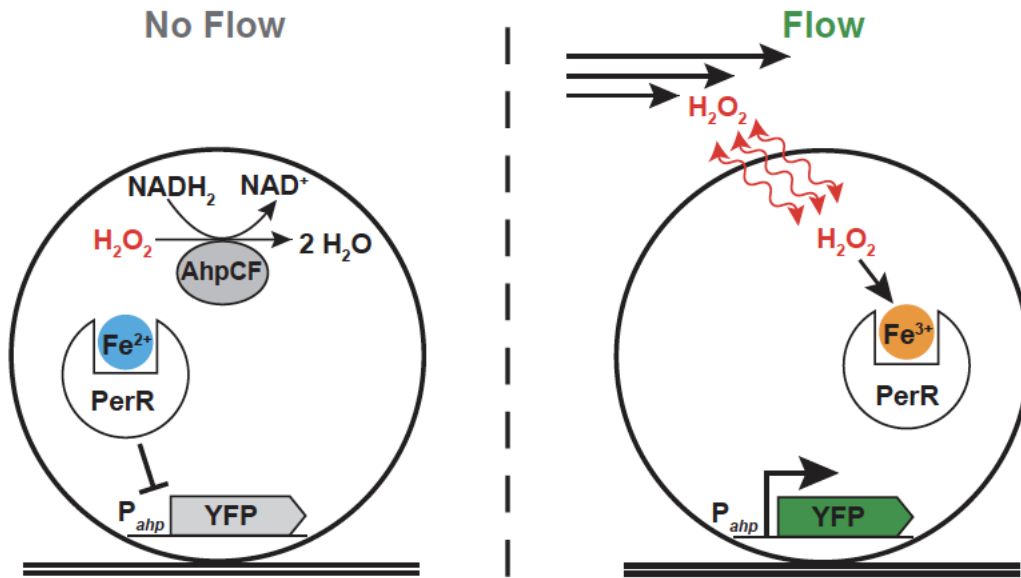

227  
228  
229  
230  
231  
232  
233  
234  
235  
236

**Figure S12: Regulatory model for flow-sensitive gene expression in *S. aureus*.** In conditions without flow, H<sub>2</sub>O<sub>2</sub> is removed from the intracellular environment by the enzymes KatA (not shown here) and AhpCF. With low intracellular H<sub>2</sub>O<sub>2</sub>, the transcriptional regulator PerR is bound to Fe<sup>2+</sup> and represses transcription from the *ahp* promoter. In conditions with flow, H<sub>2</sub>O<sub>2</sub> is replenished in the extracellular environment, which leads to a diffusion-driven accumulation of H<sub>2</sub>O<sub>2</sub> in the cell. With high intracellular H<sub>2</sub>O<sub>2</sub>, Fe<sup>2+</sup> is oxidized to Fe<sup>3+</sup>. When the transcriptional regulator PerR is bound to Fe<sup>3+</sup>, the *ahp* promoter is derepressed. Thus, flow leads to an induction of *ahpCF* transcription, which we observe as an increase in cytoplasmic YFP.



237  
238

**Table S1: Strains used in this study**

| Strain                      | Description                                                                                      | Source                              |
|-----------------------------|--------------------------------------------------------------------------------------------------|-------------------------------------|
| <b><i>P. aeruginosa</i></b> |                                                                                                  |                                     |
| PA14                        | wild-type; clinical isolate from burn wound                                                      | 52                                  |
| JS16                        | <i>froA::YFP FRT attB::[P<sub>AI1/04/03</sub>-mCherry FRT]</i>                                   | 13                                  |
| JS230                       | $\Delta katB::aacC1$                                                                             | This paper                          |
| JS231                       | $\Delta katB::FRT$                                                                               | This paper                          |
| JS232                       | $\Delta ahpCF::aacC1$                                                                            | This paper                          |
| JS233                       | $\Delta ahpCF::FRT$                                                                              | This paper                          |
| JS234                       | $\Delta ahpCF::FRT$ pUCP18-RedS                                                                  | This paper                          |
| JS235                       | $\Delta ahpCF::FRT \Delta katB::aacC1$                                                           | This paper                          |
| JS236                       | $\Delta ahpCF::FRT \Delta katB::FRT$                                                             | This paper                          |
| JS253                       | $\Delta katA::FRT$                                                                               | This paper                          |
| JS254                       | $\Delta katB::FRT \Delta katA::FRT$                                                              | This paper                          |
| JS255                       | $\Delta ahpCF::FRT \Delta katA::FRT$                                                             | This paper                          |
| JS256                       | $\Delta ahpCF::FRT \Delta katB::FRT \Delta katA::FRT$                                            | This paper                          |
| <b><i>S. aureus</i></b>     |                                                                                                  |                                     |
| USA300 JE2                  | wild-type; used for peroxide conditioned media experiments.                                      | 48                                  |
| JS244                       | $\Delta ahp$                                                                                     | This paper                          |
| JS251                       | <i>katA::erm</i>                                                                                 | This paper                          |
| JS252                       | $\Delta ahp, katA::erm$                                                                          | This paper                          |
| JS258                       | pAH5: <i>ahp</i>                                                                                 | This paper                          |
| <b><i>E. coli</i></b>       |                                                                                                  |                                     |
| MG1655                      | wild-type; used for peroxide scavenging experiments                                              | <i>E. coli</i> Genetic Stock Center |
| AG75                        | Hpx- $\Delta ccp$ ; $\Delta ahpF::kan, \Delta(katG17::Tn10)1, \Delta(katE12::Tn10)1, \Delta ccp$ | 20                                  |
| <b><i>E. faecalis</i></b>   |                                                                                                  |                                     |
| OG1RF                       | wild-type; used for peroxide conditioned media experiments.                                      | ATCC 47077                          |

239

**Table S2: Primers used in this study.**

| <b>Primer</b>        | <b>Sequence (5' to 3')</b>                                     |
|----------------------|----------------------------------------------------------------|
| <i>ahpCF-1</i>       | caccctggcgggtgctcttc                                           |
| <i>ahpCF-2</i>       | cagtcgttcctctctcagttga                                         |
| <i>ahpCF-3</i>       | cgatttgaaacacccccattcaactgagagaggaacgactgattccggggatccgctcgacc |
| <i>ahpCF-4</i>       | cgcgctccgggctccctgggtcgacggctgctggccgggggttaggctggagctgcttc    |
| <i>ahpCF-5</i>       | ggccagcgaccgtcgaac                                             |
| <i>ahpCF-6</i>       | catgctgagcaacagcggca                                           |
| <i>katA-1</i>        | tcaccctggccaaggaagac                                           |
| <i>katA-2</i>        | ttactctcctcaacggctaac                                          |
| <i>katA-3</i>        | gctcgctcatagcacgtagccgttgaggagagagtaaattccggggatccgctcgacc     |
| <i>katA-4</i>        | cccctcctaggaagggggccggggcctcatcaggccatgtgtaggctggagctgcttc     |
| <i>katA-5</i>        | tggcctgatgaggccccgg                                            |
| <i>katA-6</i>        | tcaggccaagctgttctcca                                           |
| <i>katB-1</i>        | cgctaataaggtaaaggcagtct                                        |
| <i>katB-2</i>        | ggaagagctcctaattggcttg                                         |
| <i>katB-3</i>        | ggcgcaacaagacgcctgacaagccattaggagctcttcattccggggatccgctcgacc   |
| <i>katB-4</i>        | gatagaggaagggcggcctggatggccgccccgggtgcgagttaggctggagctgcttc    |
| <i>katB-5</i>        | tcgcaaccggggcggc                                               |
| <i>katB-6</i>        | gacagcgcctggagcagctc                                           |
| <i>ahp 5' KO_fwd</i> | tacgactcactataggggatAGCGTGGCTTGGCTGCAC                         |
| <i>ahp 5' KO_rev</i> | atcaatcacaGTAACCTCTTTAAATTGATCTTTTTTTGGATCGAAAGCTTGC           |
| <i>ahp 3' KO_fwd</i> | aagaagttacGTGATTGATCGTAACAATAATAC                              |
| <i>ahp 3' KO_rev</i> | agcgagtcagtgagcgaggaATTAACATCACCGGCATATTTTG                    |
| <i>ahp prom F</i>    | gatcggatccacaccattatcaata                                      |
| <i>ahp prom R</i>    | gatcggatccataaataatcttct                                       |

241 **Table S3: Plasmids used in this study.**

| Plasmid     | Description                                                              | Reference |
|-------------|--------------------------------------------------------------------------|-----------|
| pAH5        | Plasmid for transcriptional reporter on <i>ahpCF</i> in <i>S. aureus</i> | 49        |
| pAS03       | Plasmid for generating deletion mutants in <i>P. aeruginosa</i>          | 53        |
| pFLP2       | Plasmid expressing FLP2 to recombine FRT sites                           | 54        |
| pUCP18-RedS | Lambda red recombineering vector                                         | 53        |

242

243

244 **References**

245

246 46. B. Lesic, L. G. Rahme, Use of the lambda red recombinase system to rapidly generate  
247 mutants in *Pseudomonas aeruginosa*. *BMC Mol. Biol.* 9, 20 (2008).

248

249 47. T. Bae, O. Schneewind, Allelic replacement in *Staphylococcus aureus* with inducible  
250 counterselection. *Plasmid* 55, 58–63 (2006).

251

252 48. P. D. Fey et al., A genetic resource for rapid and comprehensive phenotype screening of  
253 nonessential *Staphylococcus aureus* genes. *mBio* 4, e00537–12 (2013).

254

255 49. C. L. Malone et al., Fluorescent reporters for *Staphylococcus aureus*. *J. Microbiol. Methods*  
256 77,251–260 (2009).

257

258 50. A. Paintdakhi et al., Oufiti: An integrated software package for high-accuracy, high-  
259 throughput quantitative microscopy analysis. *Mol. Microbiol.* 99, 767–777 (2016).

260

261 51. B. Koch, L. E. Jensen, O. Nybroe, A panel of Tn7-based vectors for insertion of the GFP  
262 marker gene or for delivery of cloned DNA into Gram-negative bacteria at a neutral  
263 chromosomal site. *J. Microbiol. Methods* 45, 187–195 (2001).

264

265 52. L. G. Rahme et al., Common virulence factors for bacterial pathogenicity in plants and  
266 animals. *Science* 268, 1899–1902 (1995).

267

268 53. A. Siryaporn, S. L. Kuchma, G. A. O’Toole, Z. Gitai, Surface attachment induces  
269 *Pseudomonas aeruginosa* virulence. *Proc. Natl. Acad. Sci. U.S.A.* 111, 16860–16865 (2014).

270

271 54. T. T. Hoang, R. R. Karkhoff-Schweizer, A. J. Kutchma, H. P. Schweizer, A broad-host-range  
272 Flp-FRT recombination system for site-specific excision of chromosomally-located DNA  
273 sequences: Application for isolation of unmarked *Pseudomonas aeruginosa* mutants. *Gene* 212,  
274 77–86 (1998).
